# Supplementary material for: FepR as a Central Genetic Target in the Adaptation to Quaternary Ammonium Compounds and Cross-Resistance to Ciprofloxacin in Listeria monocytogenes
Source: Front Microbiol. 2022 May 18;13:864576. doi: 10.3389/fmicb.2022.864576 (PMC9158494; doi:10.3389/fmicb.2022.864576)
Supplement: Supplementary file 1 [file Table_1.xlsx]

## Sheet: Feuil1
	Strain	parental strain	listadapt ID	Lineage	CC	Country	Source	Contamination statuta	Contigs	N50	Assembly length	Accession number	Depth Coverage	Breadth coverage
	Parental	FR-DA-B-CH-295	FR-DA-B-CH-295	II	CC21	France	Food (Cheese )	False	2	2905522	2905873	SRR7440883	88.6987	96.44%
	Control	FR-DA-B-CH-295	FR-BIO-T-500		CC21			False	8	2905762	2907732	ERR7423509	244.9296	96.26%
	Adapted	FR-DA-B-CH-295	FR-BIO-DC-501		CC21			False	2	2905612	2905873	ERR7423510	198.2990	96.26%
	Parental	12CEB366LM	FR-ME-U-UN-465	I	CC2	France	Food (Meat)	False	1	3109433	3109433	ERR2728041	207.4452	85.32%
	Control	12CEB366LM	FR-BIO-T-502		CC2			False	4	2961334	2962147	ERR7423511	192.2181	87.23%
	Adapted	12CEB366LM	FR-BIO-BC-503		CC2			False	3	2961994	2962500	ERR7423512	208.0097	87.85%
	Adapted	12CEB366LM	FR-BIO-DC-504		CC2			False	2	2962193	2962474	ERR7423513	204.5403	86.87%
	Parental	12CEB1426LM	FR-VE-U-UN-470	II	CC37	France	Food (Vegetables)	False	3	2979818	2980871	ERS4774536	261.3963	94.97%
	Control	12CEB1426LM	FR-BIO-T-505		CC37			False	7	2981515	2983487	ERR7423516	241.4691	95.25%
	Adapted	12CEB1426LM	FR-BIO-DC-506		CC37			False	3	2938572	2939409	ERR7423517	213.5564	95.25%
	Parental	14SEL1687LM	FR-ME-P-UN-410	II	CC37	France	Food (Meat)	False	1	2893144	2893144	SRR7440969	134.9231	95.37%
	Control	14SEL1687LM	FR-BIO-T-507		CC37			False	6	2893632	2895125	ERR7423514	208.1011	95.11%
	Adapted	14SEL1687LM	FR-BIO-DC-508		CC37			False	3	2893603	2894314	ERR7423515	238.5898	95.16%
	Parental	CZ-NAT-SO-22	CZ-NAT-SO-22	I	CC1	Czech Republic	Natural environment (soil)	False	1	2917419	2917419	ERS4773933	103.5367	86.01%
	Control	CZ-NAT-SO-22	CZ-BIO-T-276		CC1			False	5	2917750	2919023	ERR7423518	217.6754	87.9%
	Adapted	CZ-NAT-SO-22	CZ-BIO-BC-277		CC1			False	3	2917941	2918893	ERR7423519	216.1234	88.18%
	Adapted	CZ-NAT-SO-22	CZ-BIO-CD-278		CC1			False	4	2917709	2918498	ERR7423520	200.3079	87.94%
	Parental	NO-DEE-FE-3	NO-DEE-FE-3	II	CC11	Norway	féces (roe deer)	False	4	2920523	2921375	ERS4774852	288.3166	95.1%
	Control	NO-DEE-FE-3	NO-BIO-T-40		CC11			False	4	2922741	2923720	ERR7423521	262.3302	95.29%
	Adapted	NO-DEE-FE-3	NO-BIO-BC-41		CC11			False	5	2922216	2923419	ERR7423522	203.7375	95.23%
	Parental	CZ-OTH-UN-8	CZ-OTH-UN-8	II	CC7	Czech Republic	animal (gerbil liver)	False	4	2951880	3009289	ERS4773956	238.8641	95.69%
	Control	CZ-OTH-UN-8	CZ-BIO-T-282		CC7			False	8	2952354	3011759	ERR7423523	220.4361	95.94%
	Adapted	CZ-OTH-UN-8	CZ-BIO-BC-283		CC7			False	4	2952781	3010302	ERR7423524	232.5757	95.9%
	Adapted	CZ-OTH-UN-8	CZ-BIO-CD-284		CC7			False	6	2952121	3011055	ERR7423525	224.9040	95.91%
	Parental	CZ-NAT-SO-15	CZ-NAT-SO-15	II	CC20	Czech Republic	Natural environment (soil)	False	14	2967417	3053984	ERS4773929	214.2788	95.09%
	Control	CZ-NAT-SO-15	CZ-BIO-T-286		CC20			False	9	2963550	3050681	ERR7423526	238.7584	95.2%
	Adapted	CZ-NAT-SO-15	CZ-BIO-BC-287		CC20			False	11	2965563	2969436	ERR7423527	265.5178	95.14%
	Adapted	CZ-NAT-SO-15	CZ-BIO-CD-288		CC20			False	12	2966334	3052492	ERR7423528	225.0361	95.24%
	Parental	IT-FOX-FE-63	IT-FOX-FE-63	I	CC1	Italy	Feces (fox)	False	1	2922223	2922223	ERS4774679	106.1596	83.96%
	Control	IT-FOX-FE-63	IT-BIO-T-137		CC1			False	4	2922296	2923236	ERR7423529	167.0813	87.56%
	Adapted	IT-FOX-FE-63	IT-BIO-BC-138		CC1			False	5	2922335	2923627	ERR7423530	215.2175	87.87%
	Adapted	IT-FOX-FE-63	IT-BIO-CD-139		CC1			False	3	2924172	2924704	ERR7423531	170.4941	88.05%
	Parental	NL-GOA-UN-2	NL-GOA-UN-2	II	CC26	Netherland	animal (goat)	False	7	2936110	3021099	ERS4774825	432.1763	95.32%
	Control	NL-GOA-UN-2	NL-BIO-T-65		CC26			False	9	2940911	2943794	ERR7423532	178.5054	95.41%
	Adapted	NL-GOA-UN-2	NL-BIO-BC-66		CC26			False	52	2942758	2962453	ERR7423533	221.3914	95.44%
	Adapted	NL-GOA-UN-2	NL-BIO-CD-67		CC26			False	9	2941419	3026351	ERR7423534	206.7074	95.35%
	Supplementary Table 1 | Genome assembly statistics
	a ConFindr was applied for detection of inter-and intra-species contamination in raw reads based on the identification of single nucleotide variants (SNVs) from multiple alleles of core, single-copy and ribosomal-protein genes
